# Supplementary material for: Evolution of river regime in the Mekong River basin over eight decades and role of dams in recent hydrologic extremes
Source: Copernicus journal article supplement (doi:10.5194/egusphere-2023-3158), 2024-01-08
Supplement: Supplementary file 1 [file egusphere-2023-3158-supplement.pdf]

## Supplementary Material

Huy Dang <sup>a</sup> and Yadu Pokhrel <sup>a,\*</sup>

<sup>a</sup> Department of Civil and Environmental Engineering, Michigan State University, East Lansing, Michigan, United States

**\*Corresponding Author:** Yadu Pokhrel ([ypokhrel@msu.edu](mailto:ypokhrel@msu.edu))

## Tables

|                                                                                          |   |
|------------------------------------------------------------------------------------------|---|
| <b>Table S1.</b> Selected hydrological monitoring stations. ....                         | 3 |
| <b>Table S2.</b> Selected dams for CaMa-Flood-Dam simulations and their attributes. .... | 3 |

## Figures

|                                                                                                                                                                                                                                                                                                                |    |
|----------------------------------------------------------------------------------------------------------------------------------------------------------------------------------------------------------------------------------------------------------------------------------------------------------------|----|
| <b>Figure S1.</b> Sample of season separation after applying a 7-days moving window filter to the simulated outflow at Chiang Saen station in year 2000. ....                                                                                                                                                  | 7  |
| <b>Figure S2.</b> Complete time series validation of daily simulated discharge at selected stations between 1979-2022 from multiple runoff datasets. It should be noted that the simulated results of year 1953 has been removed from further analysis due to problems caused by the ERA5 runoff dataset. .... | 8  |
| <b>Figure S3.</b> Same a Figure S2 but for 1940-1978; note that HiGW-MAT simulations are not available for this period. ....                                                                                                                                                                                   | 9  |
| <b>Figure S4.</b> Complete time series validation of daily simulated water level at selected stations between 1979-2022 from multiple runoff datasets. ....                                                                                                                                                    | 10 |
| <b>Figure S5.</b> Same a Figure S4 but for 1940-1978; note that HiGW-MAT simulations are not available for this period. ....                                                                                                                                                                                   | 11 |
| <b>Figure S6.</b> Decadal differences in CMFD simulated annual volume. ....                                                                                                                                                                                                                                    | 12 |
| <b>Figure S7.</b> Decadal differences in snowfall from ERA5 dataset. ....                                                                                                                                                                                                                                      | 12 |
| <b>Figure S8.</b> Decadal differences in runoff from ERA5 dataset. ....                                                                                                                                                                                                                                        | 13 |
| <b>Figure S9.</b> Decadal differences in total precipitation from ERA5 dataset. ....                                                                                                                                                                                                                           | 13 |
| <b>Figure S10.</b> Long-term average simulated discharge across the entire Mekong Region and the Tonle Sap, Mekong Delta region. ....                                                                                                                                                                          | 14 |

**Table S1.** Selected hydrological monitoring stations.

| No. | Name            | Lat     | Lon      | Discharge |            | Water level |            |
|-----|-----------------|---------|----------|-----------|------------|-------------|------------|
|     |                 |         |          | Start     | End        | Start       | End        |
| 1   | Chiang Saen     | 20.2741 | 100.0885 | 1/1/1960  | 9/19/2022  | 4/30/1960   | 9/19/2022  |
| 2   | Luang Prabang   | 19.8928 | 102.1342 | 1/1/1939  | 12/31/2018 | 1/1/1960    | 9/19/2022  |
| 3   | Chiang Khan     | 17.9003 | 101.6699 | 1/1/1967  | 9/19/2022  | 1/1/1965    | 9/19/2022  |
| 4   | Nong Khai       | 17.8814 | 102.7322 | 1/1/1969  | 9/19/2022  | 1/1/1965    | 9/19/2022  |
| 5   | Nakhon Phanom   | 17.4254 | 104.7739 | 1/1/1924  | 9/19/2022  | 4/1/1972    | 9/19/2022  |
| 6   | Mukdahan        | 16.5828 | 104.7332 | 1/1/1923  | 9/19/2022  | 1/1/1960    | 9/19/2022  |
| 7   | Pakse           | 15.0998 | 105.8132 | 1/1/1923  | 9/19/2022  | 1/1/1960    | 9/19/2022  |
| 8   | Stung Treng     | 13.5325 | 105.9502 | 1/1/1910  | 9/19/2022  | 1/1/1910    | 9/19/2022  |
| 9   | Kratie          | 12.4814 | 106.0176 | 1/1/1924  | 9/19/2022  | 1/8/1933    | 9/19/2022  |
| 10  | Chroy Chang Var | 11.5874 | 104.9384 | 1/1/1960  | 12/31/2002 | 1/1/1960    | 12/31/2012 |
| 11  | Kompong Cham    | 11.9110 | 105.3841 | 1/1/1960  | 12/31/2002 | 1/1/1930    | 9/19/2022  |
| 12  | Chau Doc        | 10.7053 | 105.1335 | 1/1/2001  | 12/31/2007 |             |            |
| 13  | Can Tho         | 10.0529 | 105.7871 | 1/1/2001  | 12/31/2007 | 4/1/1979    | 9/19/2022  |

**Table S2.** Selected dams for CaMa-Flood-Dam simulations and their attributes.

| No. | Project name  | Lat   | Lon    | Purpose | COD  | Height (m) | Total storage (FSL, Mm3) |
|-----|---------------|-------|--------|---------|------|------------|--------------------------|
| 1   | A Luoi        | 16.20 | 107.16 | HPD     | 2012 | 49.5       |                          |
| 2   | Battambang 1  | 12.80 | 102.91 | MPD     | 2018 | 56.8       | 193.43                   |
| 3   | Bien Ho       | 14.06 | 108.00 | ID      | 1983 | 21         | 42                       |
| 4   | Buôn Kuốp     | 12.53 | 107.93 | HPD     | 2010 |            | 14                       |
| 5   | Buon Tua Srah | 12.28 | 108.04 | HPD     | 2009 | 80         | 522                      |
| 6   | Chulabhorn    | 16.54 | 101.65 | HPD     | 1972 | 70         | 165                      |
| 7   | Cibihu        | 26.13 | 99.96  | ID      | 1956 |            | 93.22                    |
| 8   | Dachaoshan    | 24.02 | 100.37 | HPD     | 2003 | 111        | 940                      |
| 9   | Dahuaqiao     | 26.31 | 99.14  | HPD     | 2019 | 106        | 293                      |
| 10  | Dak Doa       | 14.18 | 108.11 | HPD     | 2010 | 20         | 29.13                    |
| 11  | Dak N'Teng    | 12.20 | 107.93 | HPD     | 2011 | 31         | 25.49                    |
| 12  | Dak Psi 5     | 14.66 | 107.94 | HPD     | 2012 |            | 3.53                     |
| 13  | Dak Wi        | 14.54 | 107.97 | ID      | 1977 |            | 26.2                     |
| 14  | Dak Yen       | 14.29 | 107.98 | ID      | 2008 | 22.5       | 6.45                     |
| 15  | Don Sahong    | 13.94 | 105.96 | HPD     | 2020 | 22.5       | 25                       |
| 16  | Dong'erhe     | 23.08 | 101.06 | ID      | 1959 | 26.43      | 1070                     |
| 17  | Dray H'Linh 1 | 12.67 | 107.91 | HPD     | 1990 |            | 1                        |
| 18  | Ea Kao        | 12.61 | 108.04 | ID      | 1983 | 17         | 17.74                    |
| 19  | Ea Sup        | 13.07 | 107.89 | ID      | 1980 | 10         | 5.55                     |
| 20  | Ea Sup Thuong | 13.03 | 107.93 | ID      | 2004 | 26         | 146.94                   |

| No. | Project name       | Lat   | Lon    | Purpose | COD  | Height (m) | Total storage (FSL, Mm3) |
|-----|--------------------|-------|--------|---------|------|------------|--------------------------|
| 21  | ErChahe            | 24.44 | 99.86  | HPD     | 2008 | 46         | 10.92                    |
| 22  | Gongguoqiao        | 25.59 | 99.34  | HPD     | 2012 | 105        | 316                      |
| 23  | Guodazhai          | 24.30 | 99.78  | ID      | 2017 | 83.5       | 50.93                    |
| 24  | GuoDuo             | 31.53 | 97.19  | HPD     | 2015 | 93         | 82.72                    |
| 25  | Haixihai           | 26.28 | 99.97  | ID      | 1995 | 21         | 62                       |
| 26  | Hoàng Ân           | 13.82 | 107.95 | ID      | 1976 | 20         | 6.9                      |
| 27  | Houay Ho           | 15.06 | 106.76 | HPD     | 1999 | 79         | 3530                     |
| 28  | Houay Lamphan      | 15.36 | 106.50 | HPD     | 2015 | 75.6       | 141                      |
| 29  | Hua Na             | 15.13 | 104.70 | HPD     | 1995 | 17         |                          |
| 30  | Huai Kum           | 16.41 | 101.79 | HPD     | 1980 | 35.5       | 22                       |
| 31  | Huai Luang         | 17.37 | 102.60 | ID      | 1984 | 12.5       | 113                      |
| 32  | Huangdeng          | 26.56 | 99.12  | HPD     | 2019 | 203        | 1613                     |
| 33  | Jinfeng            | 21.59 | 101.23 | HPD     | 1998 | 45         | 19.48                    |
| 34  | Jinghong           | 22.05 | 100.77 | HPD     | 2008 | 108        |                          |
| 35  | Jinhe              | 30.81 | 97.33  | HPD     | 2004 | 34         | 4.27                     |
| 36  | Kamping Puoy       | 13.08 | 102.97 | ID      | 1977 |            | 110                      |
| 37  | Krông Buk Hạ       | 12.78 | 108.37 | ID      | 2013 | 35.45      | 109.34                   |
| 38  | Lam Chamuak        | 15.08 | 102.49 | ID      | 1992 | 18         | 26                       |
| 39  | Lam Nang Rong      | 14.30 | 102.76 | ID      | 1982 | 23         | 150                      |
| 40  | Lam Pao            | 16.60 | 103.45 | ID      | 1968 | 33         | 1340                     |
| 41  | Lam Phra Phloeng   | 14.59 | 101.84 | ID      | 1967 | 50         | 110                      |
| 42  | Lam Plai Mat       | 14.30 | 102.44 | ID      | 1988 | 44.6       | 98                       |
| 43  | Lam Sae            | 14.42 | 102.27 | ID      | 1988 | 29.5       | 275                      |
| 44  | Lam Ta Khong P.S.  | 14.87 | 101.56 | HPD     | 1974 | 40.3       | 310                      |
| 45  | Laoyinyan          | 24.47 | 99.82  | HPD     | 1997 | 4.23       | 1092                     |
| 46  | Lidi               | 27.85 | 99.03  | HPD     | 2019 | 75         | 75                       |
| 47  | Lower Sesan 2      | 13.55 | 106.26 | HPD     | 2018 | 75         | 2715                     |
| 48  | Luozhaha 1         | 24.51 | 100.45 | HPD     | 2016 | 59         | 14.33                    |
| 49  | Luozhaha 2         | 24.49 | 100.40 | HPD     | 2017 | 71         | 3391                     |
| 50  | Manfeilong         | 21.91 | 100.78 | ID      | 1958 |            | 10.64                    |
| 51  | Manman             | 21.88 | 100.21 | ID      | 1970 |            | 14.5                     |
| 52  | Manwan             | 24.62 | 100.45 | HPD     | 1995 | 132        | 1006                     |
| 53  | Mengbang Reservoir | 21.92 | 100.28 | ID      | 1958 |            | 17.86                    |
| 54  | Menglun            | 21.93 | 101.18 | ID      | 2011 |            | 6.8                      |
| 55  | Miaowei            | 25.85 | 99.16  | HPD     | 2017 | 139.8      | 660                      |
| 56  | Mun Bon            | 14.48 | 102.15 | ID      | 1980 | 32.7       | 141                      |
| 57  | Nam Beng           | 19.95 | 101.24 | HPD     | 2017 | 25.5       | 3611                     |
| 58  | Nam Chian 1        | 19.15 | 103.56 | HPD     | 2018 | 93         | 23.12                    |
| 59  | Nam Houm           | 18.18 | 102.47 | ID      | 1981 | 22         | 42                       |
| 60  | Nam Khan 2         | 19.69 | 102.37 | HPD     | 2016 | 160        | 528                      |

| No. | Project name | Lat   | Lon    | Purpose | COD  | Height (m) | Total storage (FSL, Mm3) |
|-----|--------------|-------|--------|---------|------|------------|--------------------------|
| 61  | Nam Khan 3   | 19.75 | 102.22 | HPD     | 2016 | 90         | 860.5                    |
| 62  | Nam Kong 1   | 14.54 | 106.74 | HPD     | 2021 | 80         | 505                      |
| 63  | Nam Kong 2   | 14.49 | 106.86 | HPD     | 2018 | 50         | 71.4                     |
| 64  | Nam Kong 3   | 14.57 | 106.91 | HPD     | 2021 | 65         | 471                      |
| 65  | Nam Leuk     | 18.44 | 102.95 | HPD     | 2000 | 51.5       | 185                      |
| 66  | Nam Lik 1    | 18.62 | 102.39 | HPD     | 2019 | 36.5       | 6.8                      |
| 67  | Nam Lik 1-2  | 18.79 | 102.12 | HPD     | 2010 | 103        | 11.13                    |
| 68  | Nam Mang 1   | 18.53 | 103.20 | HPD     | 2017 | 70         | 16.52                    |
| 69  | Nam Mang 3   | 18.35 | 102.77 | HPD     | 2005 | 28         | 49.43                    |
| 70  | Nam Nga 2    | 20.18 | 101.92 | HPD     | 2017 | 47         | 157.7                    |
| 71  | Nam Ngiep 1  | 18.65 | 103.55 | HPD     | 2019 | 167        | 1192                     |
| 72  | Nam Ngiep 2  | 19.30 | 103.35 | HPD     | 2015 | 70.5       | 163                      |
| 73  | Nam Ngiep 3A | 19.24 | 103.28 | HPD     | 2014 | 30         |                          |
| 74  | Nam Ngum 1   | 18.53 | 102.55 | HPD     | 1971 | 75         | 4700                     |
| 75  | Nam Ngum 2   | 18.76 | 102.78 | HPD     | 2013 | 181        | 3590                     |
| 76  | Nam Ngum 5   | 19.36 | 102.62 | HPD     | 2012 | 99         | 314                      |
| 77  | Nam Ou 1     | 20.09 | 102.27 | HPD     | 2020 | 65         | 89.1                     |
| 78  | Nam Ou 2     | 20.41 | 102.47 | HPD     | 2016 | 49         | 121.7                    |
| 79  | Nam Ou 3     | 20.70 | 102.67 | HPD     | 2020 | 72         | 181                      |
| 80  | Nam Ou 4     | 21.12 | 102.49 | HPD     | 2020 | 47         | 141.6                    |
| 81  | Nam Ou 5     | 21.41 | 102.34 | HPD     | 2016 | 74         | 335                      |
| 82  | Nam Ou 6     | 21.78 | 102.20 | HPD     | 2016 | 88         | 409                      |
| 83  | Nam Ou 7     | 22.08 | 102.26 | HPD     | 2020 | 143        | 1770                     |
| 84  | Nam Pha Gnai | 19.01 | 102.87 | HPD     | 2020 | 70         |                          |
| 85  | Nam Pung     | 16.97 | 103.98 | MPD     | 1965 | 41         | 165                      |
| 86  | Nam San 3A   | 19.13 | 103.66 | HPD     | 2016 | 75         | 123                      |
| 87  | Nam San 3B   | 19.09 | 103.62 | HPD     | 2015 |            | 11.7                     |
| 88  | Nam Tha 1    | 20.27 | 100.87 | HPD     | 2019 | 93.65      | 1755                     |
| 89  | Nam Theun 1  | 18.36 | 104.15 | HPD     | 2022 | 177        | 3009                     |
| 90  | Nam Theun 2  | 18.00 | 104.95 | HPD     | 2010 | 48         | 3500                     |
| 91  | Nam Un       | 17.30 | 103.76 | ID      | 1973 | 29.5       | 520                      |
| 92  | Nandeng      | 23.70 | 99.89  | MPD     | 2010 | 89         | 51.49                    |
| 93  | Nanhe 1      | 24.34 | 100.01 | HPD     | 2009 | 56.8       | 11.36                    |
| 94  | Nuozadu      | 22.64 | 100.44 | HPD     | 2014 | 261.5      | 23703                    |
| 95  | Pak Mun      | 15.28 | 105.47 | HPD     | 1994 | 17         | 0.13                     |
| 96  | Plei Krong   | 14.41 | 107.86 | HPD     | 2008 | 65         | 1048.7                   |
| 97  | Pleipai      | 13.49 | 107.90 | ID      | 2011 | 16.5       | 13.28                    |
| 98  | Sesan 3      | 14.22 | 107.72 | HPD     | 2006 | 79         | 3.8                      |
| 99  | Sesan 3A     | 14.11 | 107.66 | HPD     | 2007 | 35         | 239                      |
| 100 | Sesan 4      | 13.97 | 107.50 | HPD     | 2009 | 74         | 893                      |

| No. | Project name       | Lat   | Lon    | Purpose | COD  | Height (m) | Total storage (FSL, Mm3) |
|-----|--------------------|-------|--------|---------|------|------------|--------------------------|
| 101 | Sesan 4a           | 13.93 | 107.47 | HPD     | 2011 | 17.3       | 13.13                    |
| 102 | Siridhorn          | 15.21 | 105.43 | HPD     | 1971 | 42         | 1967                     |
| 103 | Srepok 3           | 12.75 | 107.88 | HPD     | 2009 | 52.5       | 219                      |
| 104 | Srepok 4           | 12.81 | 107.86 | HPD     | 2011 | 155        |                          |
| 105 | Theun-Hinboun      | 18.26 | 104.56 | HPD     | 1998 | 27         |                          |
| 106 | Theun-Hinboun exp. | 18.30 | 104.64 | HPD     | 2013 | 65         | 2450                     |
| 107 | Ubol Ratana        | 16.78 | 102.62 | HPD     | 1966 | 35.1       | 2559                     |
| 108 | Upper Kontum       | 14.69 | 108.23 | HPD     | 2021 |            | 145.52                   |
| 109 | Weiyuanjiang       | 23.28 | 100.56 | HPD     | 2014 |            | 274                      |
| 110 | Wunonglong         | 27.93 | 98.93  | HPD     | 2019 | 137        | 284                      |
| 111 | Xayaburi           | 19.25 | 101.81 | HPD     | 2019 | 32.6       | 1300                     |
| 112 | Xe Lanong 1        | 16.36 | 106.24 | HPD     | 2021 |            | 373                      |
| 113 | Xekaman 1          | 14.96 | 107.16 | HPD     | 2016 | 120        | 3340                     |
| 114 | Xekaman 3          | 15.43 | 107.36 | HPD     | 2013 | 101.5      | 141.5                    |
| 115 | Xekaman-Sanxay     | 14.89 | 107.12 | HPD     | 2018 | 28         |                          |
| 116 | Xepian-Xenamnoy    | 14.95 | 106.63 | HPD     | 2019 | 75.5       | 1092                     |
| 117 | Xeset 1            | 15.49 | 106.28 | HPD     | 1990 | 18         |                          |
| 118 | Xeset 2            | 15.40 | 106.28 | HPD     | 2009 | 26         | 9                        |
| 119 | Xiangshui          | 23.77 | 100.63 | ID      | 1989 | 54         | 56.7                     |
| 120 | Xiaowan            | 24.70 | 100.09 | HPD     | 2010 | 292        | 15043                    |
| 121 | Xi'er He 2         | 25.56 | 100.13 | HPD     | 1987 | 37.25      | 0.2                      |
| 122 | Xi'er He 4         | 25.58 | 100.07 | HPD     | 1971 |            | 14                       |
| 123 | Ximahe             | 22.78 | 100.98 | ID      | 1956 |            | 420                      |
| 124 | Xinfang Reservoir  | 22.72 | 100.96 | ID      | 1958 |            | 7.1                      |
| 125 | XunCun             | 25.42 | 99.99  | HPD     | 1999 | 67         | 73.74                    |
| 126 | Yali               | 14.23 | 107.83 | HPD     | 2001 | 65         | 1037.09                  |

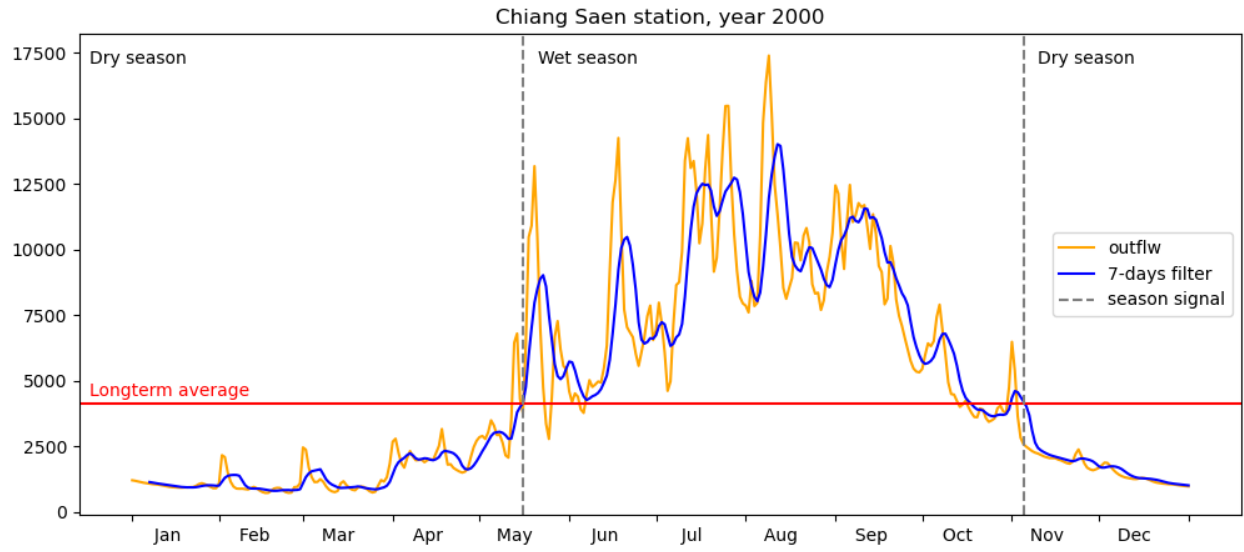

**Figure S1.** Sample of season separation after applying a 7-days moving window filter to the simulated outflow at Chiang Saen station in year 2000.

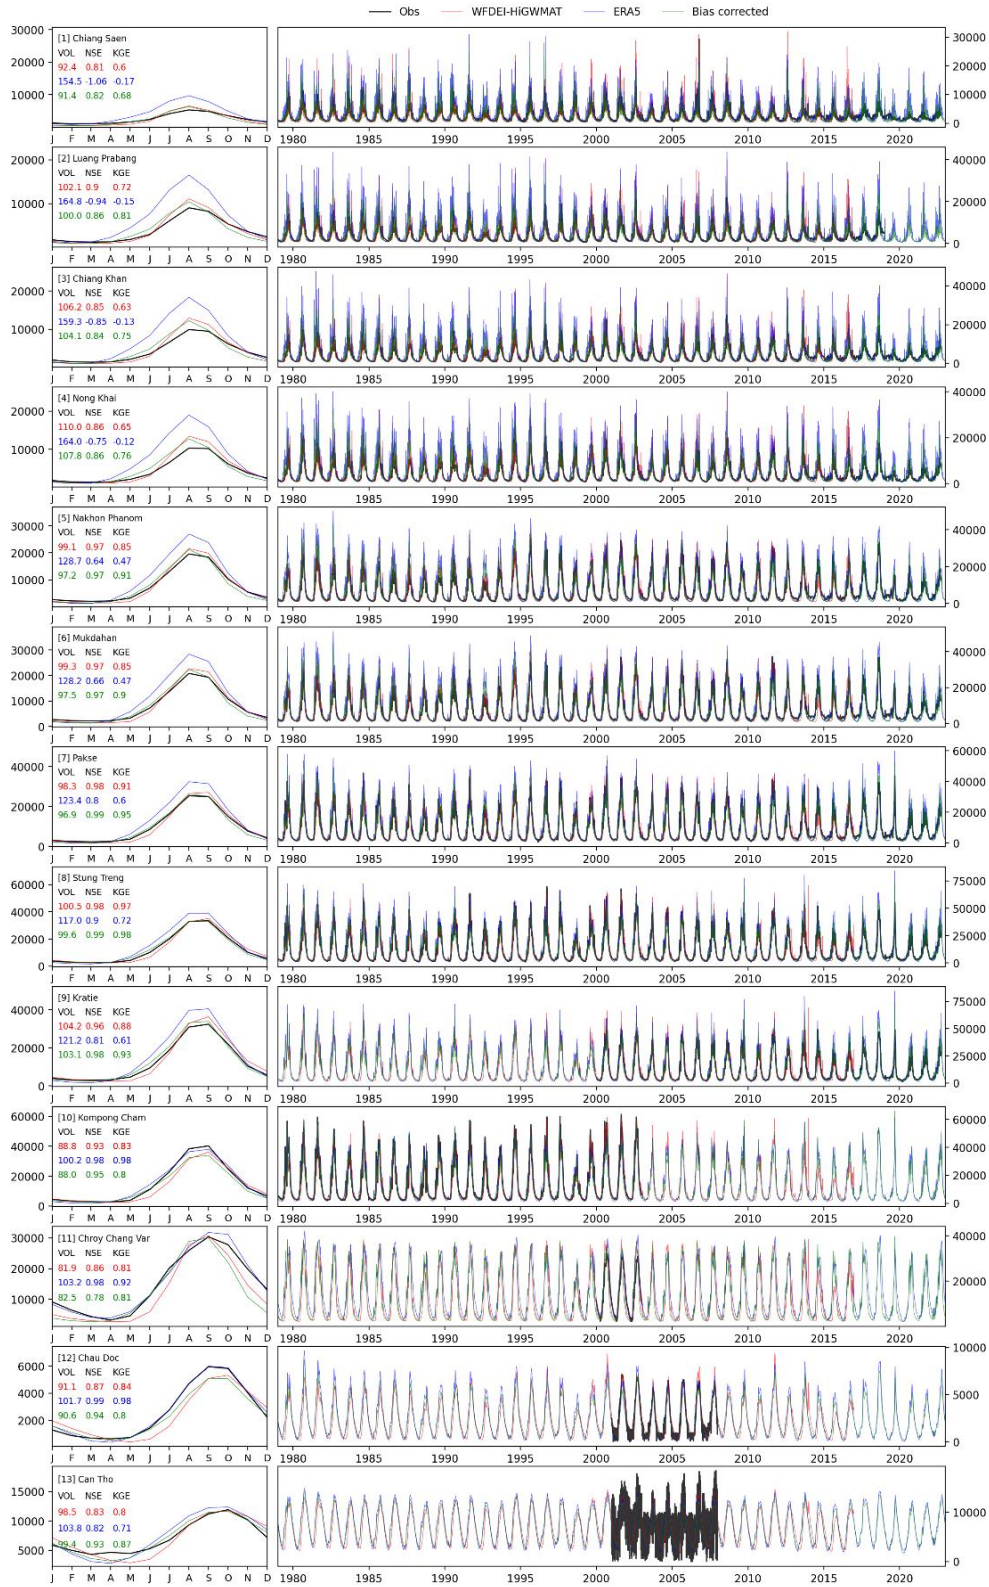

**Figure S2.** Complete time series validation of daily simulated discharge at selected stations between 1979-2022 from multiple runoff datasets. It should be noted that the simulated results of year 1953 has been removed from further analysis due to problems caused by the ERA5 runoff dataset.



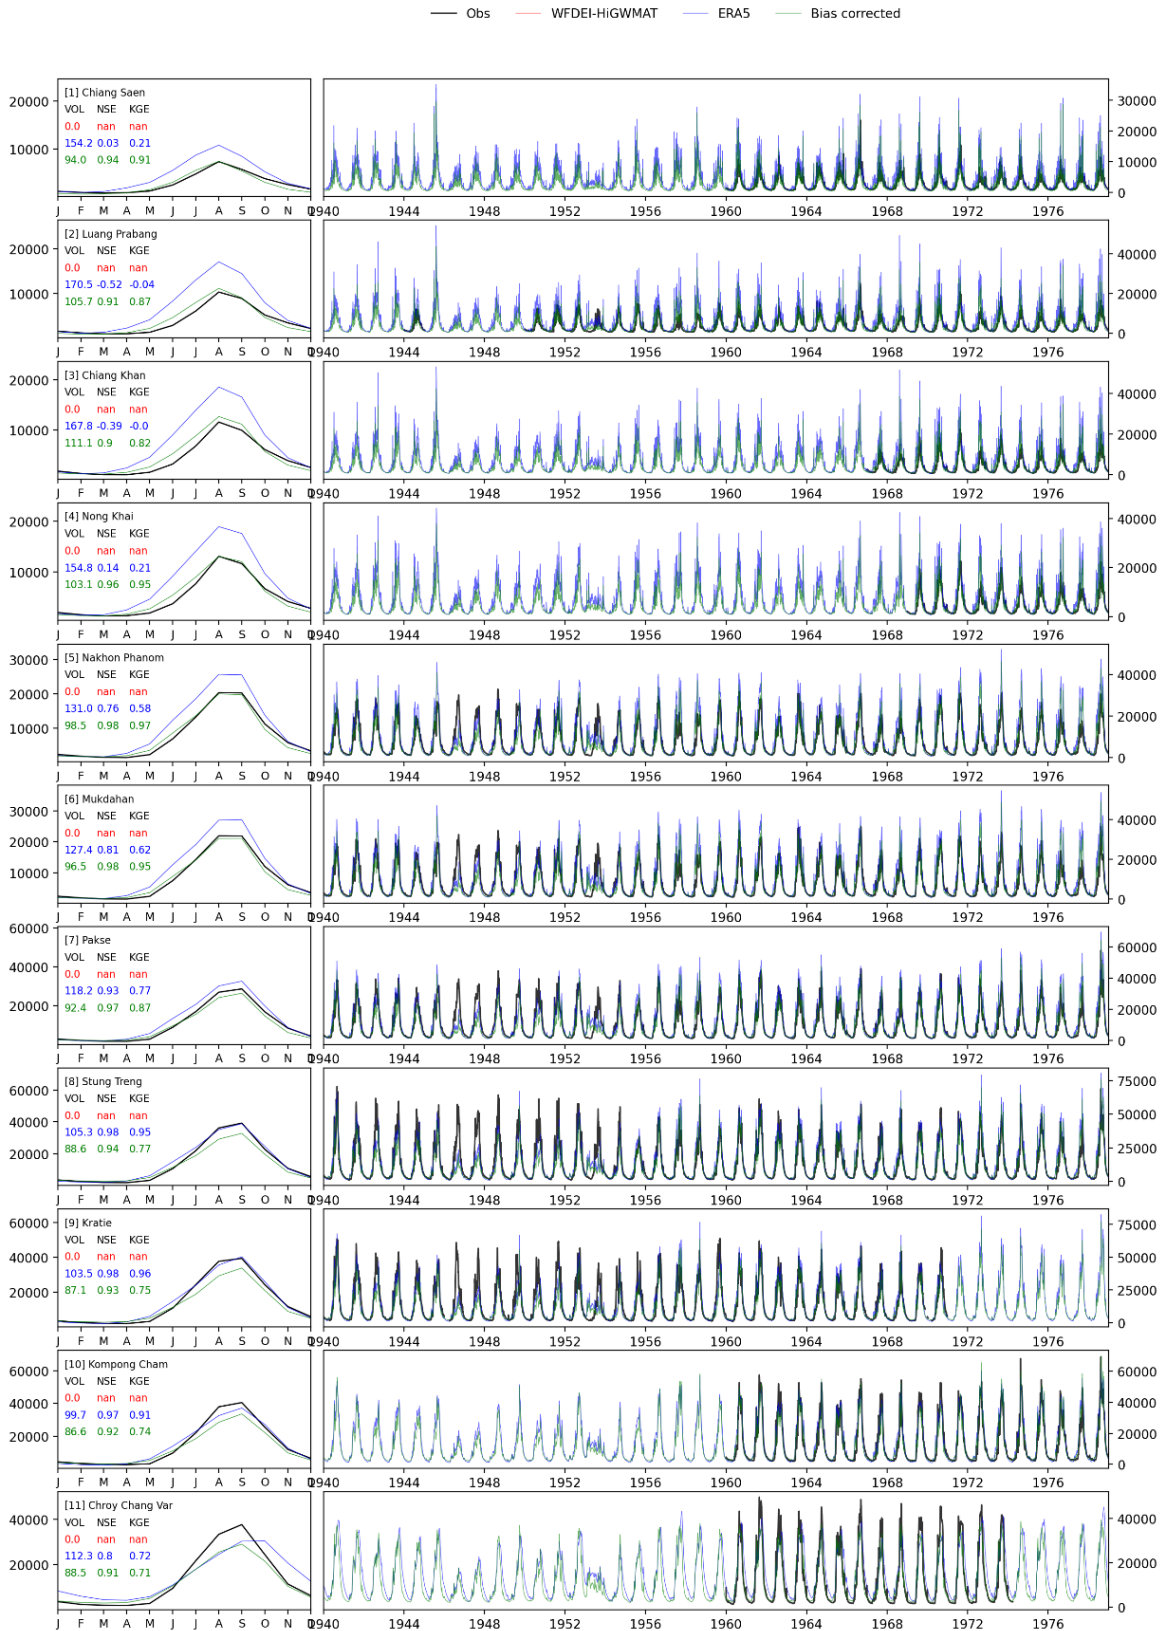

Figure S3. Same a Figure S2 but for 1940-1978; note that HiGW-MAT simulations are not available for this period.

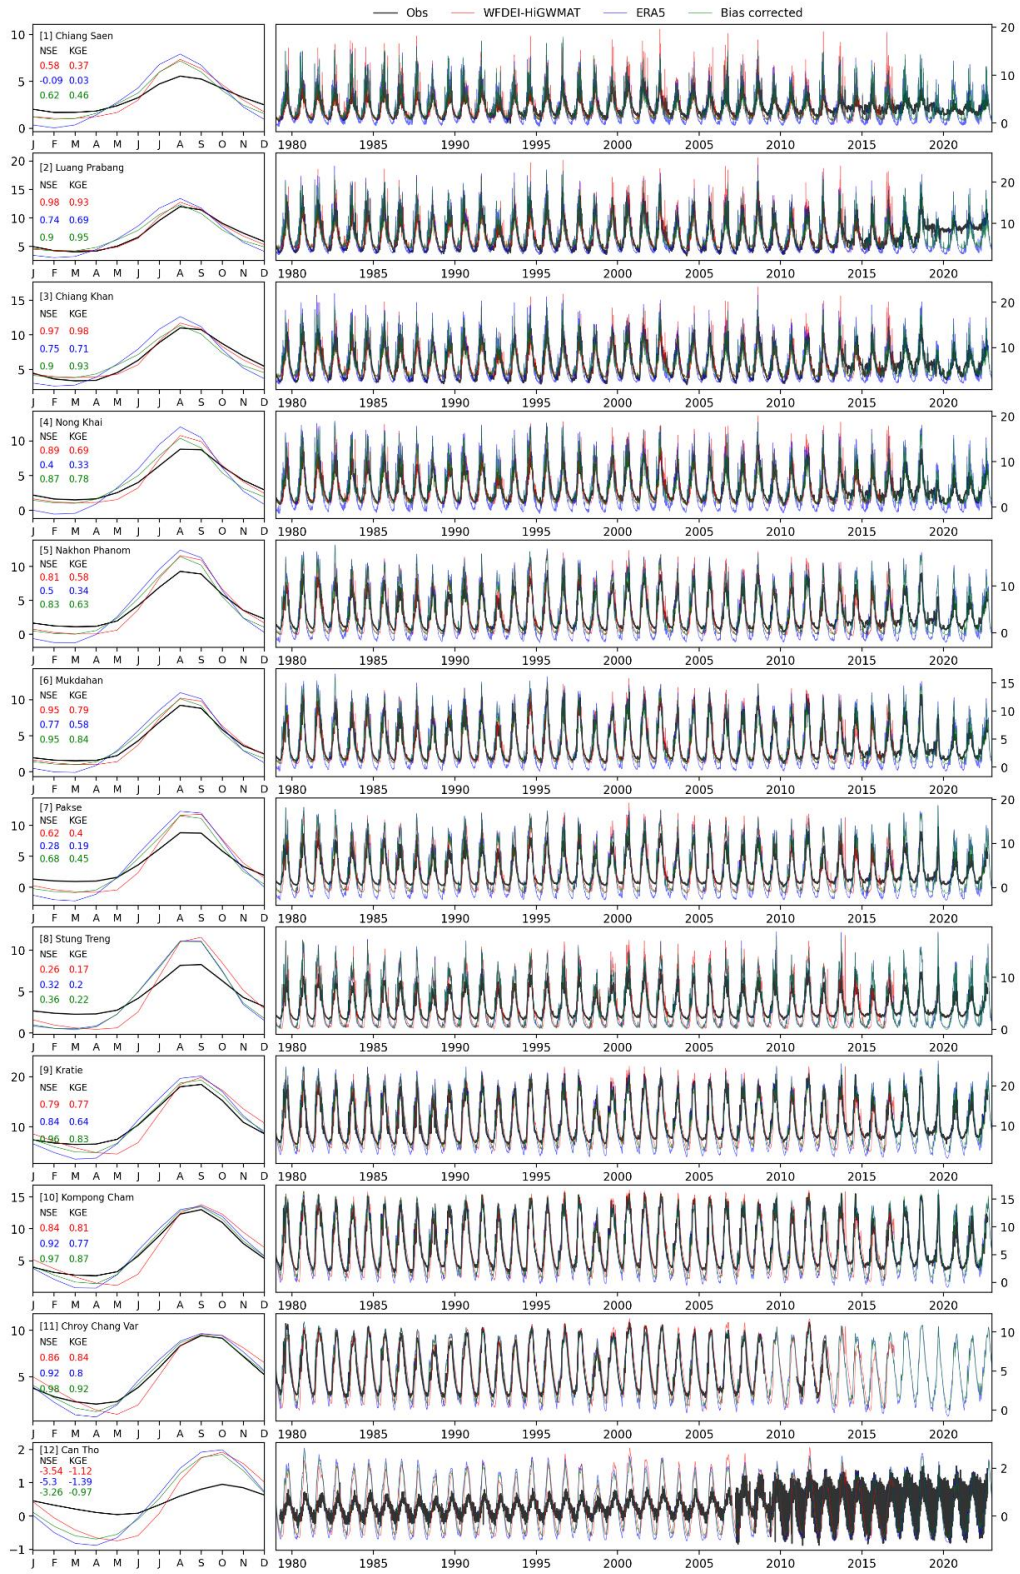

**Figure S4.** Complete time series validation of daily simulated water level at selected stations between 1979-2022 from multiple runoff datasets.

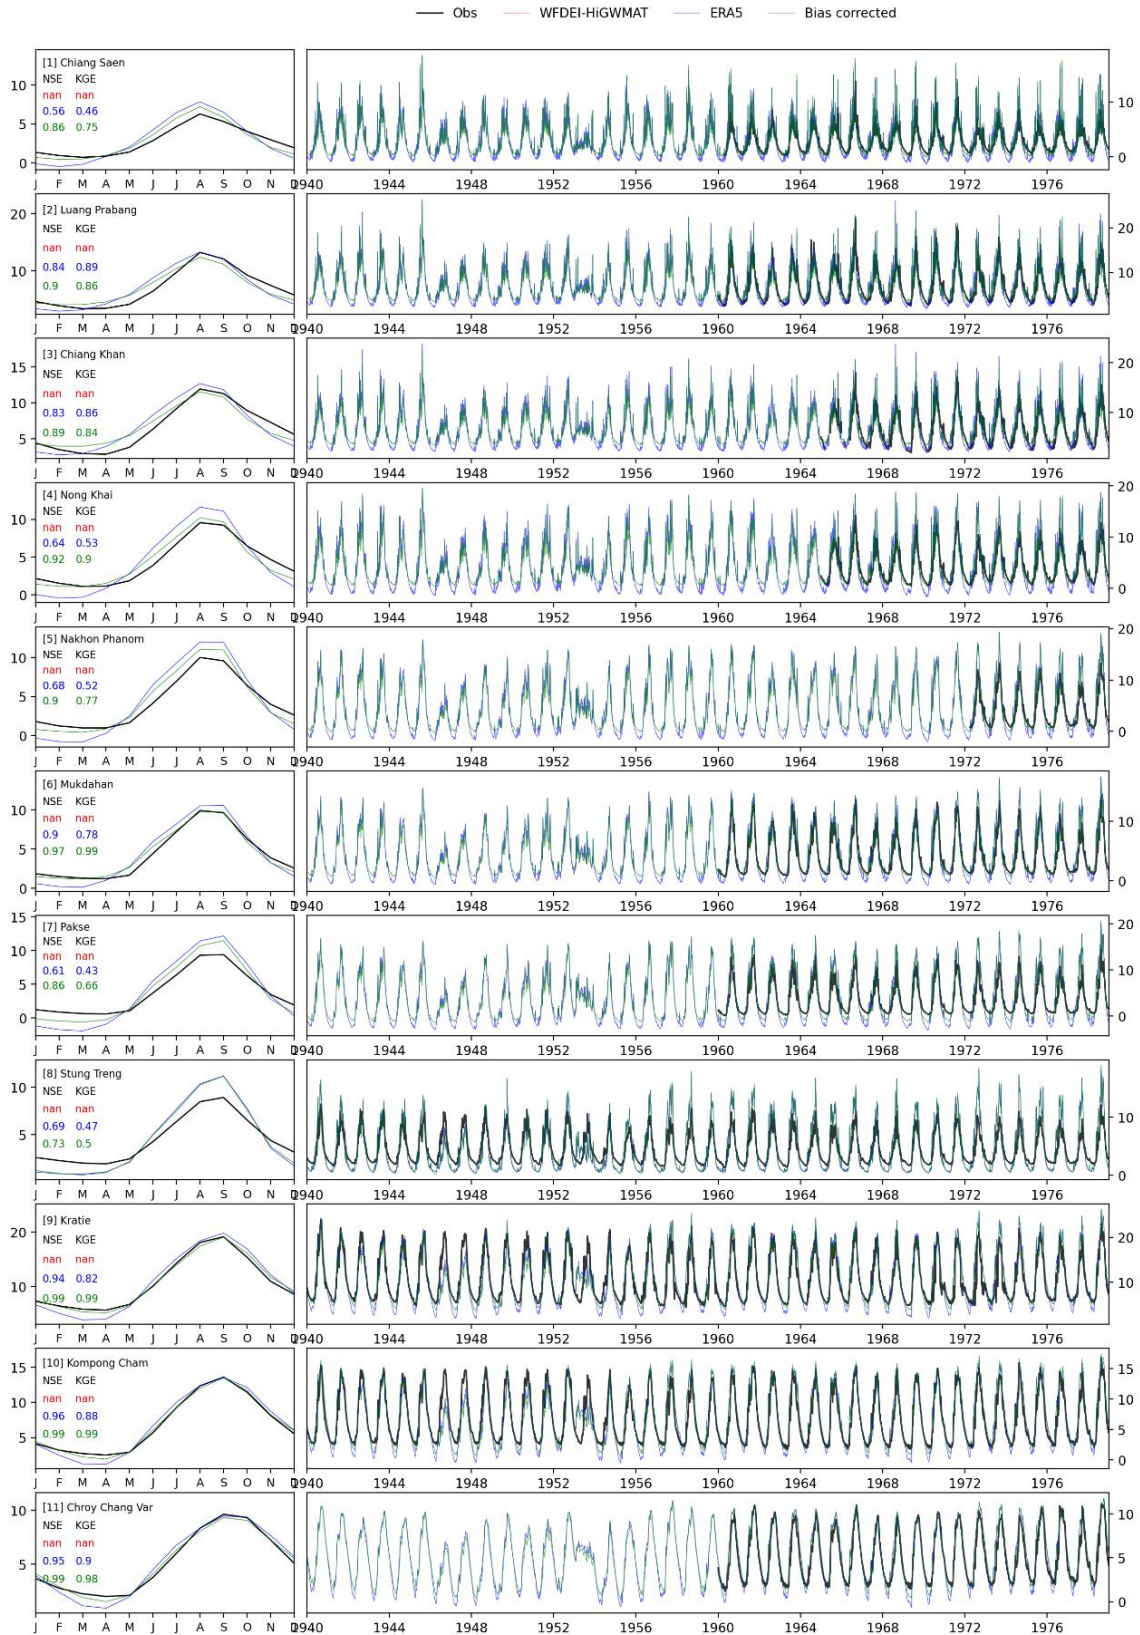

Figure S5. Same a Figure S4 but for 1940-1978; note that HiGW-MAT simulations are not available for this period.

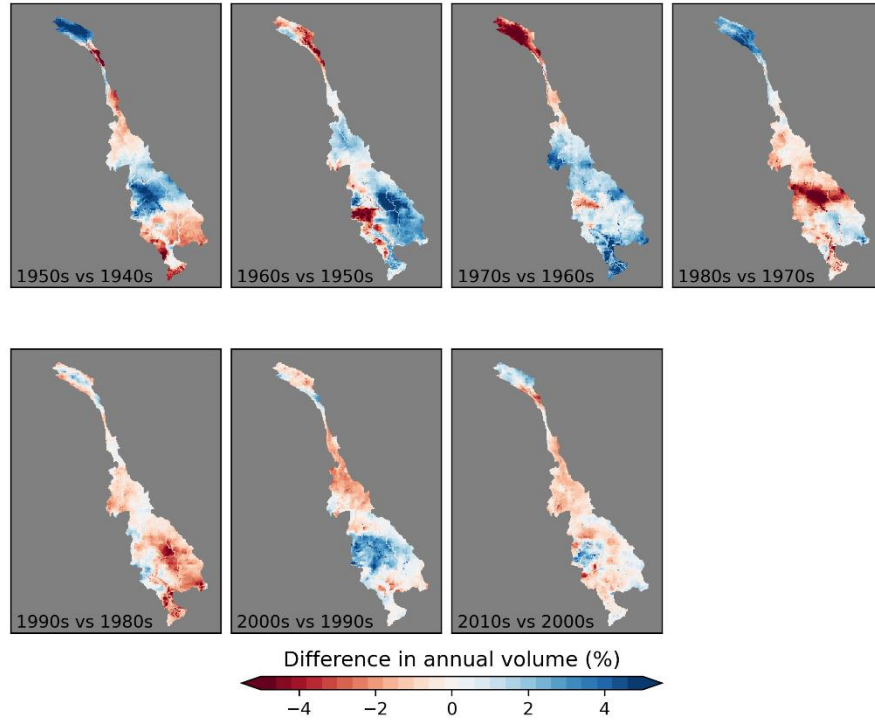

**Figure S6.** Decadal differences in CMFD simulated annual volume.

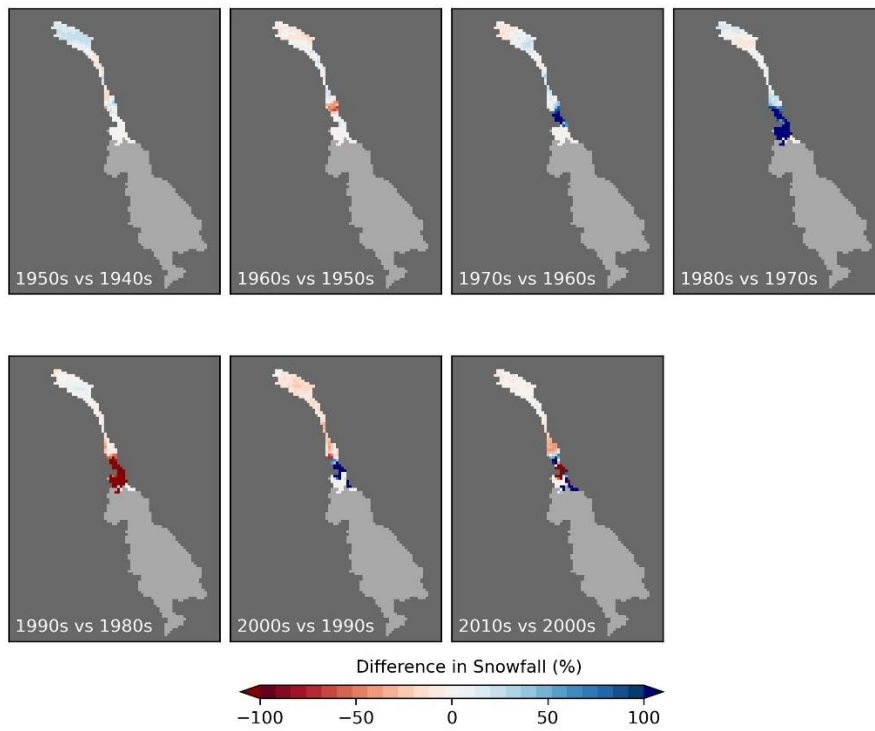

**Figure S7.** Decadal differences in snowfall from ERA5 dataset.

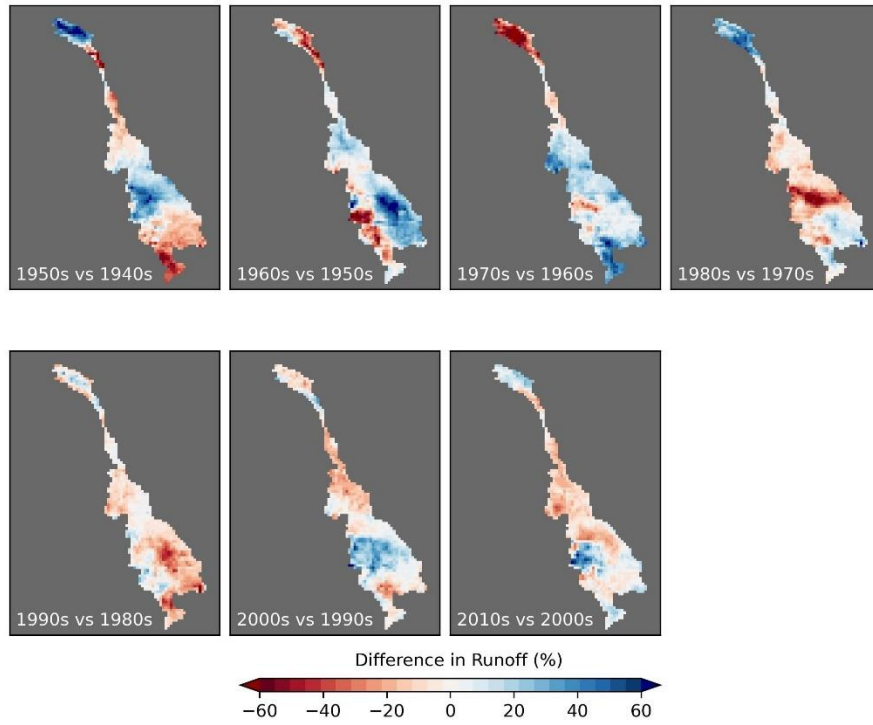

**Figure S8.** Decadal differences in runoff from ERA5 dataset.

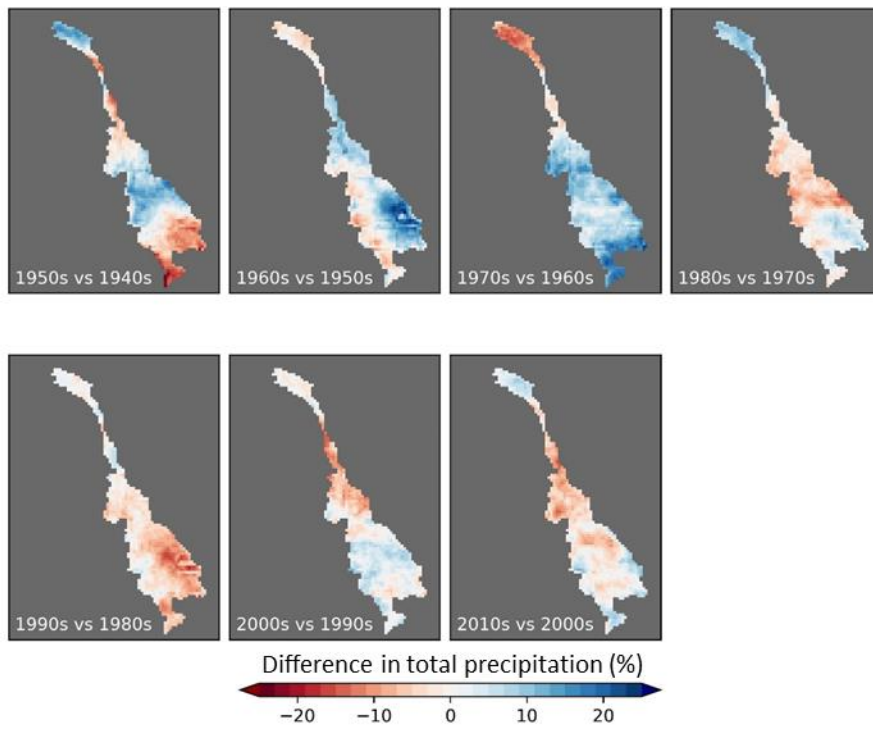

**Figure S9.** Decadal differences in total precipitation from ERA5 dataset.

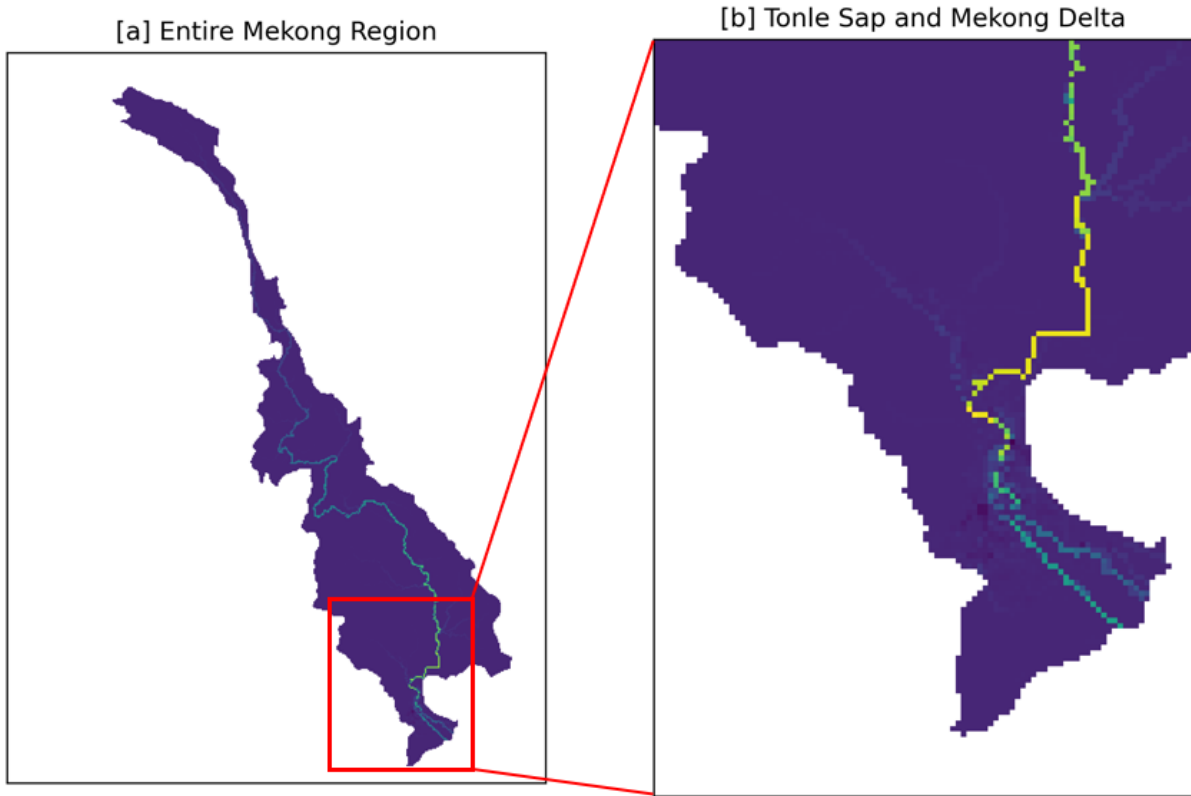

**Figure S10.** Long-term average simulated discharge across the entire Mekong Region and the Tonle Sap, Mekong Delta region.
